# Supplementary material for: Key components to the recent performance increases of solution processed non-fullerene small molecule acceptors
Source: Royal Society of Chemistry journal article supplement (doi:10.1039/c5ta04310g), 2015-01-01
Supplement: c5ta04310g1.pdf [file c5ta04310g1.pdf]

**Key components to the recent performance increases of solution  
processed non-fullerene small molecule acceptors**

Seth M. McAfee,<sup>1</sup> Jessica M. Topple,<sup>2</sup> Ian G. Hill,<sup>2\*</sup> and Gregory C. Welch<sup>1\*</sup>

*Department of Chemistry<sup>1</sup>, Department of Physics<sup>2</sup>  
Dalhousie University, 6274 Coburg Road  
Halifax, Nova Scotia, Canada B3H 4R2*

**Supporting Information**

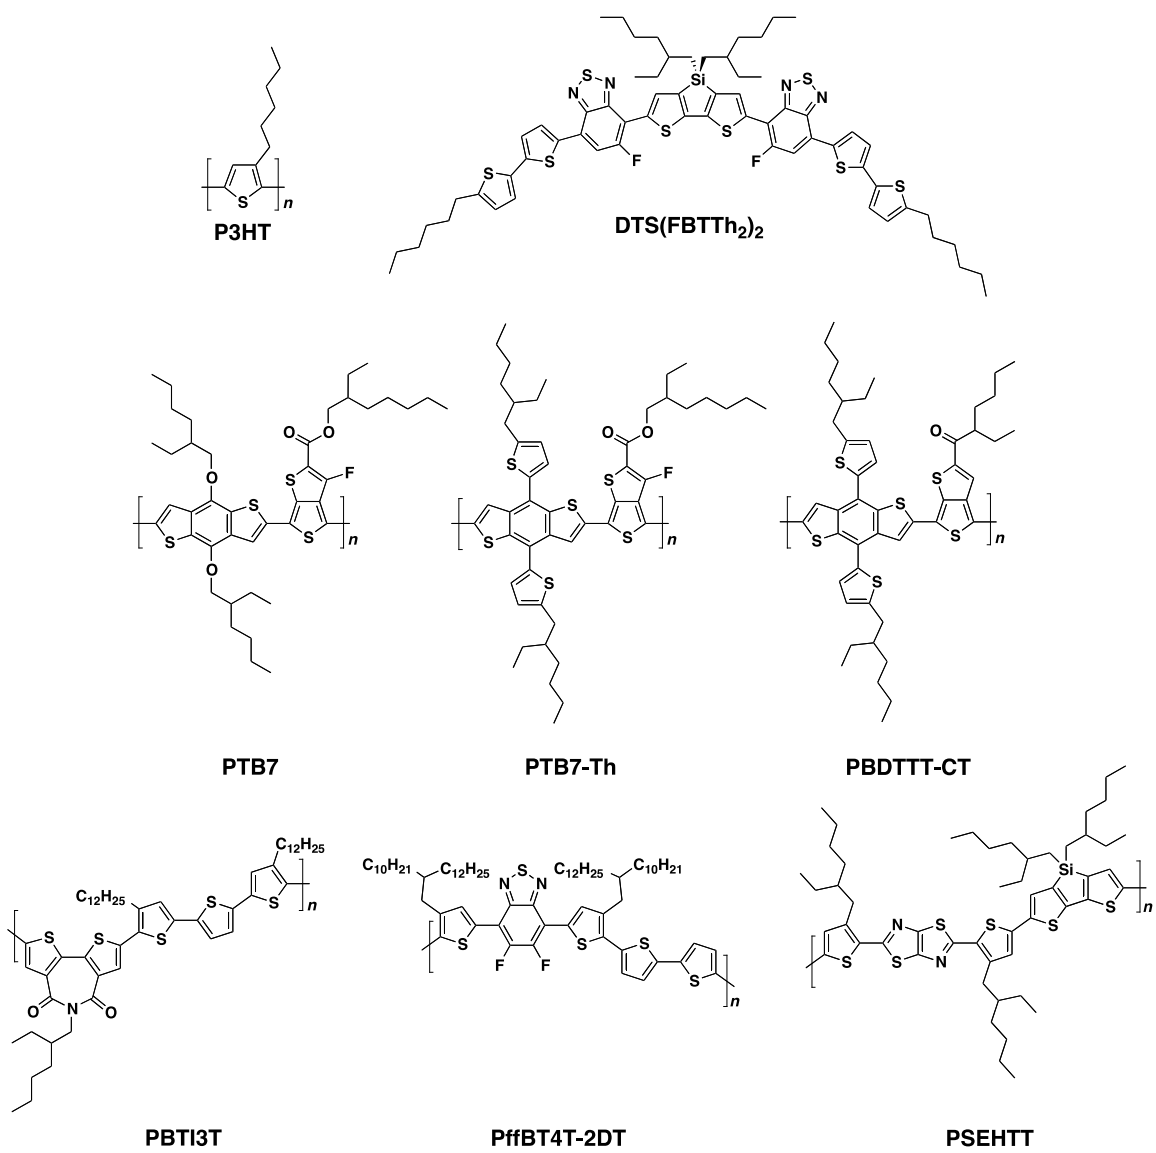

**Figure S1.** High performance donor materials employed in BHJ OPV devices with small molecule non-fullerene acceptors.

**Table S1.** Material properties of high performance donor materials.

| Non-Fullerene Acceptor                             | HOMO (eV) | LUMO (eV) | Band Gap (eV) <sup>a</sup> | Abs <sub>max</sub> (nm) <sup>b</sup> | Abs <sub>onset</sub> (nm) <sup>b</sup> | Ref |
|----------------------------------------------------|-----------|-----------|----------------------------|--------------------------------------|----------------------------------------|-----|
| <b>P3HT</b>                                        | -5.2      | -3.2      | 2.0                        | 550                                  | 650                                    | 1   |
| <b><i>p</i>-DTS(FBTTh<sub>2</sub>)<sub>2</sub></b> | -5.1      | -3.3      | 1.8                        | 678                                  | 800                                    | 2   |
| <b>PTB7</b>                                        | -5.1      | -3.5      | 1.6                        | 700                                  | 750                                    | 3   |
| <b>PTB7-Th</b>                                     | -5.2      | -3.6      | 1.6                        | 725                                  | 775                                    | 3   |
| <b>PBDTTT-CT</b>                                   | -5.1      | -3.3      | 1.9                        | 630                                  | 682                                    | 4   |
| <b>PBTI3T</b>                                      | -5.6      | -3.8      | 1.8                        | 575                                  | 685                                    | 5   |
| <b>PfBT4T-2DT</b>                                  | -5.4      | -3.7      | 1.7                        | 700                                  | 750                                    | 6   |
| <b>PSEHTT</b>                                      | -5.1      | -3.3      | 1.8                        | 579                                  | 681                                    | 7   |

Material properties are compiled from many different laboratory settings, we caution the reader when comparing these experimental values.

Energy levels determined using cyclic voltammetry.

<sup>a</sup> Electrochemical band gap

<sup>b</sup> Thin-film absorption

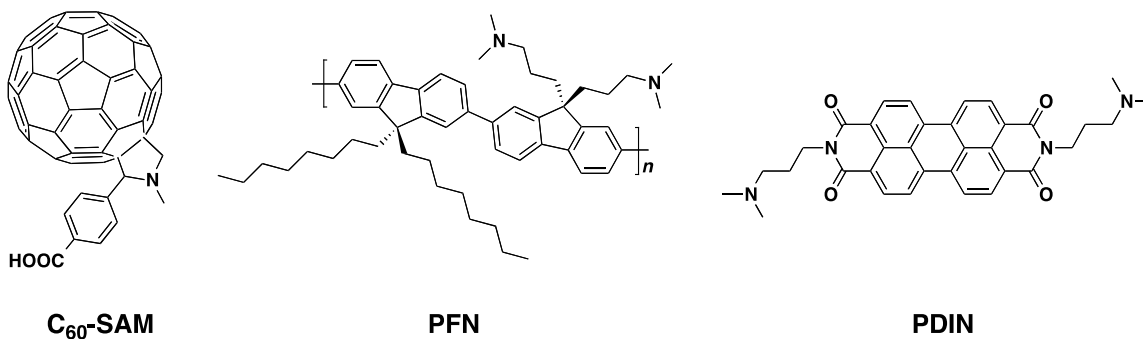

**Figure S2.** Structure of interlayer materials used in non-fullerene acceptor device architectures.

## References

- 1 Z. Mao, W. Senevirathna, J.-Y. Liao, J. Gu, S. V. Kesava, C. Guo, E. D. Gomez and G. Sauvé, *Adv. Mater.*, 2014, **26**, 6290–6294.
- 2 T. S. van der Poll, J. A. Love, T.-Q. Nguyen and G. C. Bazan, *Adv. Mater.*, 2012, **24**, 3646–3649.
- 3 S.-H. Liao, H.-J. Jhuo, Y.-S. Cheng and S.-A. Chen, *Adv. Mater.*, 2013, **25**, 4766–4771.
- 4 L. Huo, S. Zhang, X. Guo, F. Xu, Y. Li and J. Hou, *Angew. Chem. Int. Ed.*, 2011, **50**, 9697–9702.
- 5 X. Guo, N. Zhou, S. J. Lou, J. Smith, D. B. Tice, J. W. Hennek, R. P. Ortiz, J. T. L. Navarrete, S. Li, J. Strzalka, L. X. Chen, R. P. H. Chang, A. Facchetti and T. J. Marks, *Nat. Photonics*, 2013, **7**, 825–833.
- 6 J. Zhao, Y. Li, H. Lin, Y. Liu, K. Jiang, C. Mu, T. Ma, J. Y. L. Lai, H. Hu, D. Yu and H. Yan, *Energy Environ. Sci.*, 2015, **8**, 520–525.
- 7 S. Subramanian, H. Xin, F. S. Kim, S. Shoaee, J. R. Durrant and S. A. Jenekhe, *Adv. Energy Mater.*, 2011, **1**, 854–860.
